# Supplementary material for: RUNX1 prevents oestrogen-mediated AXIN1 suppression and β-catenin activation in ER-positive breast cancer
Source: PubMed Central journal article supplement (PMC4773428; doi:10.1038/ncomms10751), 2016-02-26
Supplement: ncomms10751-s1.pdf [file ncomms10751-s1.pdf]

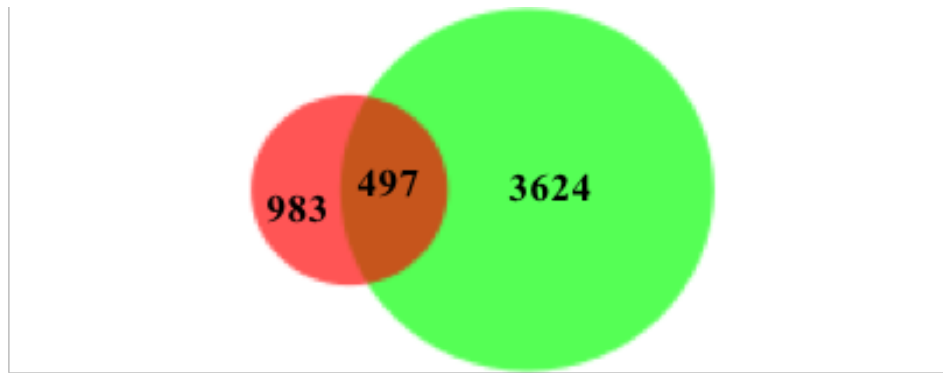

**TCGA BCa cohort:**  
**RUNX1-mt N=17**  
**RUNX1-wt N=389**

**Ellis cohort:**  
**RUNX1-mt N=7**  
**RUNX1-wt N=202**

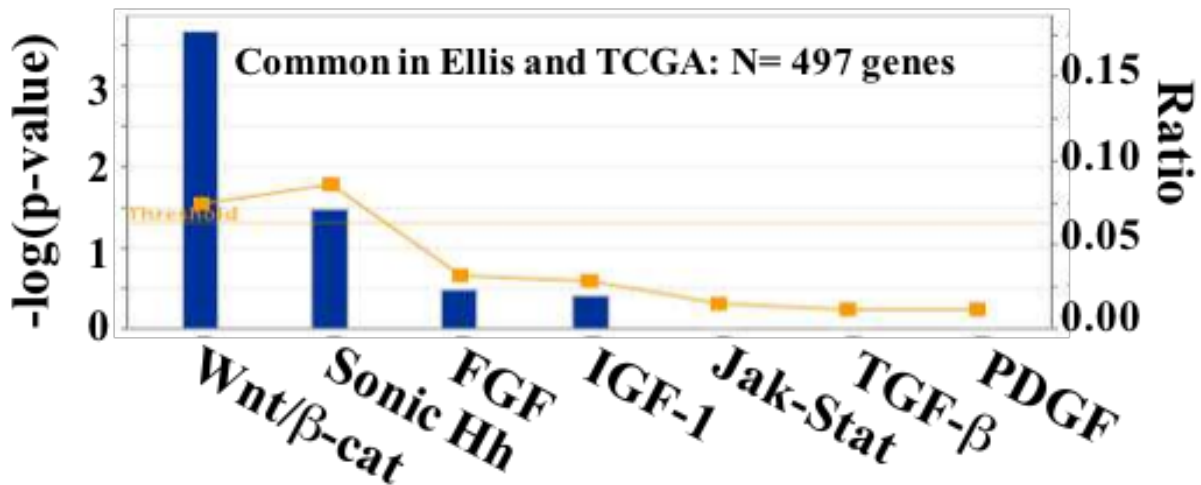

**Supplementary Fig. 1. Annotations of genes differentially expressed in breast cancer tumors with *RUNX1* mutations in two independent cohorts suggest deregulation of Wnt/β-catenin signaling.**

Genes differentially expressed in ER<sup>+</sup> tumors with wild-type versus mutant *RUNX1* in the breast cancer cohorts of both TCGA (<https://tcga-data.nci.nih.gov/tcga/>) and Ellis et al. (PMID: 22722193), listed in Supplemental Data 3, were interrogated by IPA<sup>TM</sup> for annotations related to major developmental signaling pathways. Line graph represent fold enrichment and bars represent statistical significance calculated by Fisher's exact test as implemented in the IPA<sup>TM</sup> software.

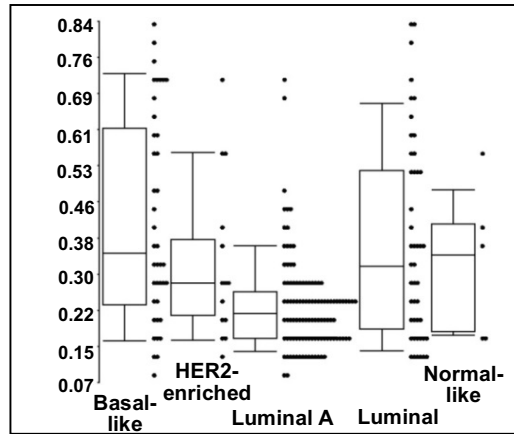

**Supplementary Fig. 2. *RUNXI* methylation across breast cancer subtypes**

*RUNXI* methylation status in the five major breast cancer subtypes was assessed based on data for probe cg01265860 retrieved from the breast invasive carcinoma cohort of TCGA (<https://tcga-data.nci.nih.gov/tcga/>). Methylation levels differ significantly between subtypes ( $p=1.96e-08$  by ANOVA).

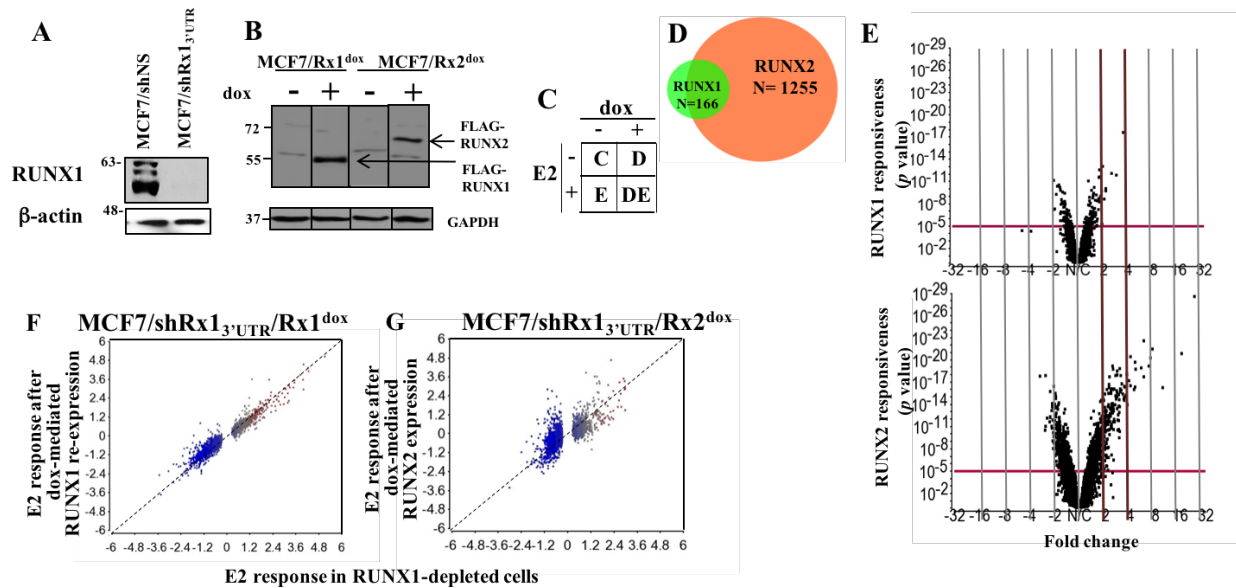

### Supplementary Fig. 3. RUNX1 vs. RUNX2 transcriptome in MCF7 cells.

MCF7 cells were engineered to silence RUNX1 constitutively and express FLAG-RUNX1 or FLAG-RUNX2 in response to dox.

**A-B.** Western blot analysis demonstrating effective silencing of RUNX1 by constitutive expression of shRx1<sub>3'UTR</sub> versus a non-specific (*NS*) shRNA. Dox treatment for 48h induced expression of FLAG-RUNX1 and FLAG-RUNX2 in MCF7/shRx1<sub>3'UTR</sub>/Rx1<sup>dox</sup> and MCF7/shRx1<sub>3'UTR</sub>/Rx2<sup>dox</sup> cells, respectively. **C-E.** Cells were kept in CSS for 2 days and treated with dox and/or E2 for 48 h as indicated (C) and global changes in mRNA expression was profiled in triplicate using the HumanHT-12 v4 BeadChip (Illumina). Venn Diagram (D) and volcano plots (E) demonstrate far more robust response to RUNX2 as compared to RUNX1. **F-G.** Scatter plots for the E2-responsive genes (fold-change >1.2-fold, FDR<0.05 in both the MCF7/shRx1<sub>3'UTR</sub>/Rx1<sup>dox</sup> and MCF7/shRx1<sub>3'UTR</sub>/Rx2<sup>dox</sup> cells) demonstrate strong attenuation of the global E2 response by RUNX2 (slope=0.6624, r=0.7223), but not by RUNX1 (slope=0.8865, r=0.9635).

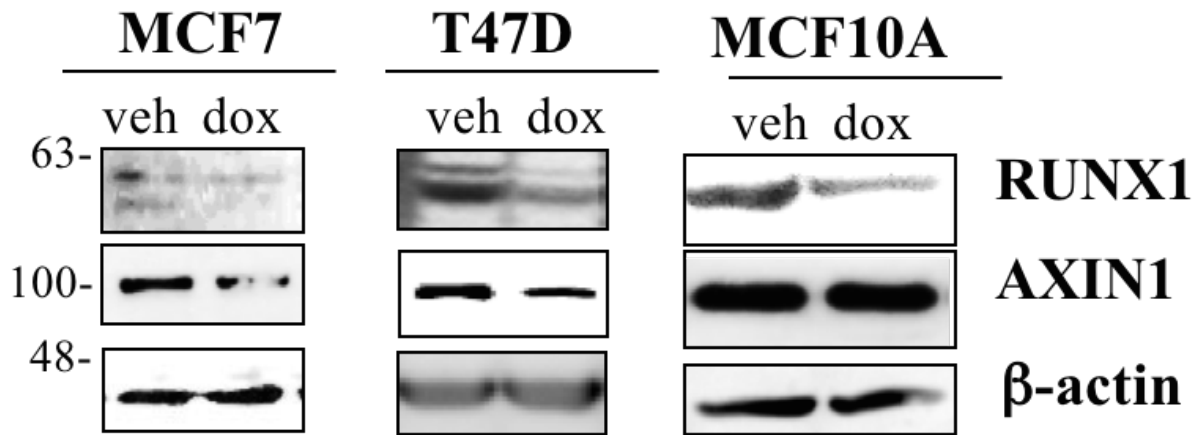

**Supplementary Fig. 4.** MCF7, T47D (ER<sup>+</sup>) and MCF10A (ER<sup>-</sup>) cells were engineered to express shRx1<sub>RUNX1</sub> upon doxycycline treatment. Cells were treated with 250 ng/ml dox for 4 days and whole cell extracts were subjected to western blot analysis of the indicated proteins.

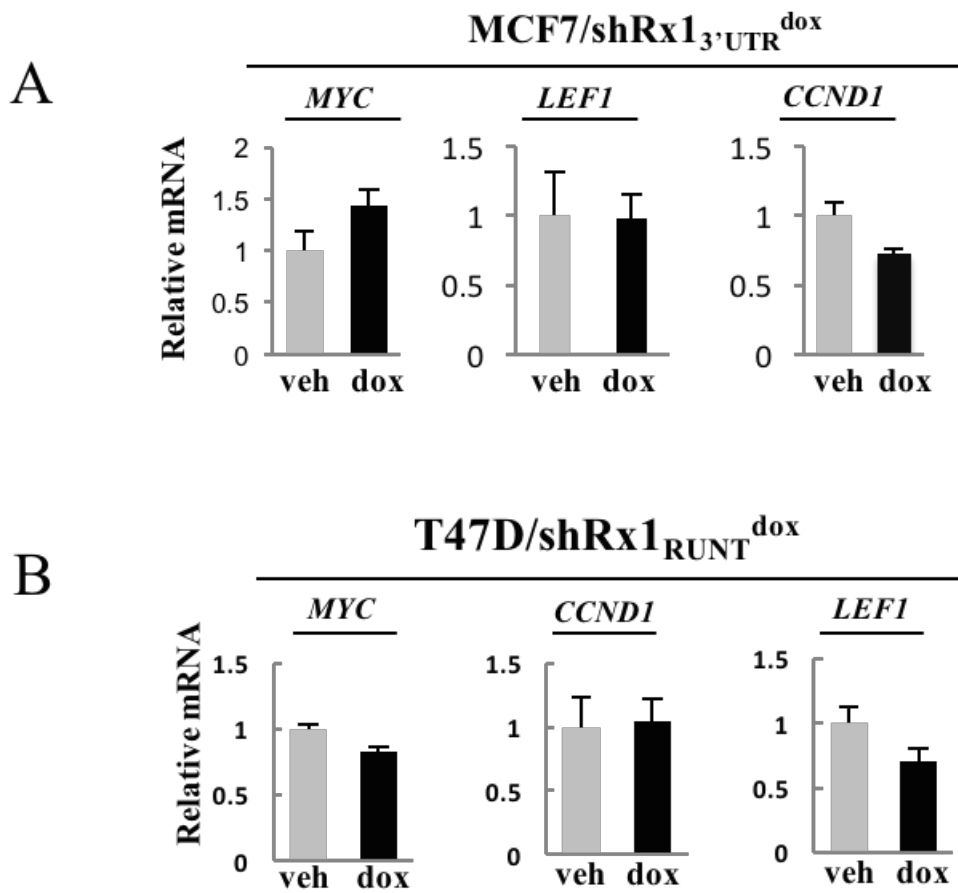

**Supplementary Fig. 5.** MCF7/shRx1<sub>3'UTR</sub><sup>dox</sup> (A) and T47D/shRx1<sub>RUNT</sub><sup>dox</sup> (B) cells were treated with 250 ng/ml dox for 48h and total RNA was subjected to RT-qPCR analysis of the indicated mRNAs. Data was corrected for 18S RNA and represent mean±SEM from triplicate experiments.

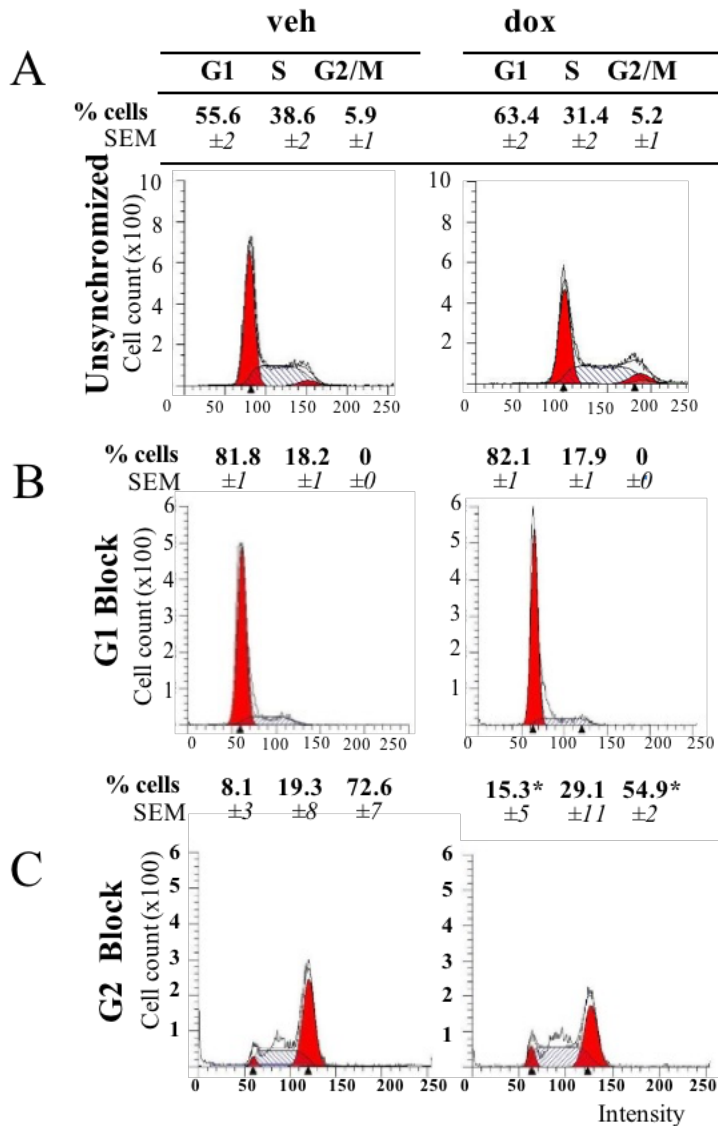

**Supplementary Fig. 6: Compromised G2/M arrest, but not G1/S arrest in MCF7/shRx1<sup>dox</sup> RUNT<sup>dox</sup> cultures.**

MCF7/shRx1<sup>dox</sup> RUNT<sup>dox</sup> cells were treated with dox and synchronized in order to investigate effects of RUNX1 silencing on P-b-cat as described in Figure 6H. Cells were subjected to a double thymidine block to induce a G1 block (B), which was followed by nocodazole treatment to induce a G2 block (C). The synchronized (B, C) and control cells (A) were subjected to propidium iodide staining and flow cytometry analysis to determine the percentage of cells in G1, S and G2/M. Data are Mean ± SEM from three independent experiments, with a representative cell cycle profile shown for each condition. \**p*<0.05 by t-test.

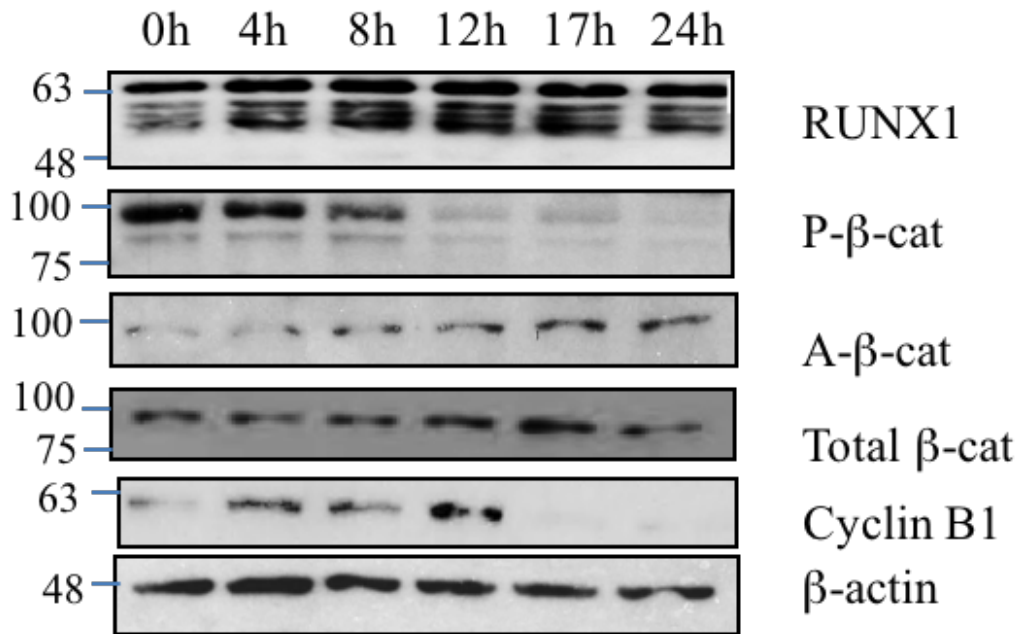

**Supplementary Fig. 7. Cell cycle-dependent P-β-catenin expression in MCF7 cells**

Western blot analysis of the indicated proteins at the indicated time points after release of MCF7 cells from a double thymidine block.

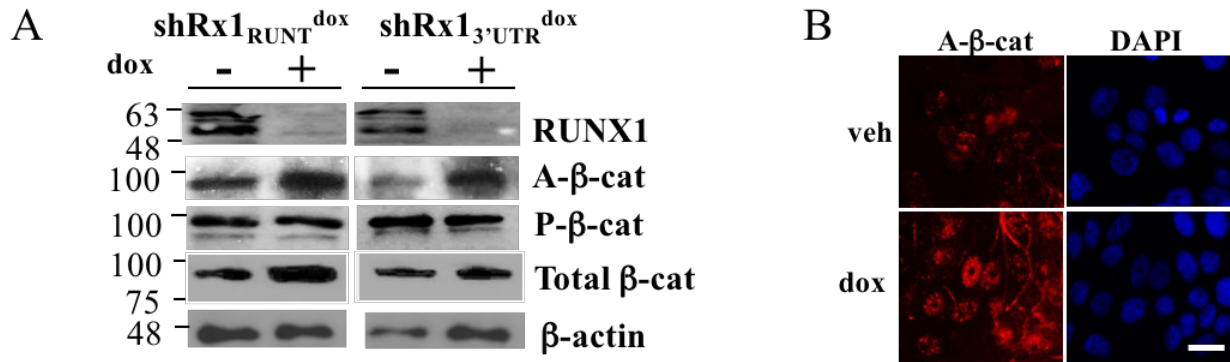

**Supplementary Fig. 8. A**, MCF7 cells conditionally expressing either shRx1<sub>RUNT</sub><sup>dox</sup> (*left*) or shRx1<sub>3'UTR</sub><sup>dox</sup> (*right*) were treated with 250 ng/ml dox for 4 days followed by western analysis of the indicated proteins. **B**, Immunofluorescence analysis of A-β-cat in MCF7/shRx1<sub>RUNT</sub><sup>dox</sup> cells treated with dox for 48h. Scale bar = 50 μm



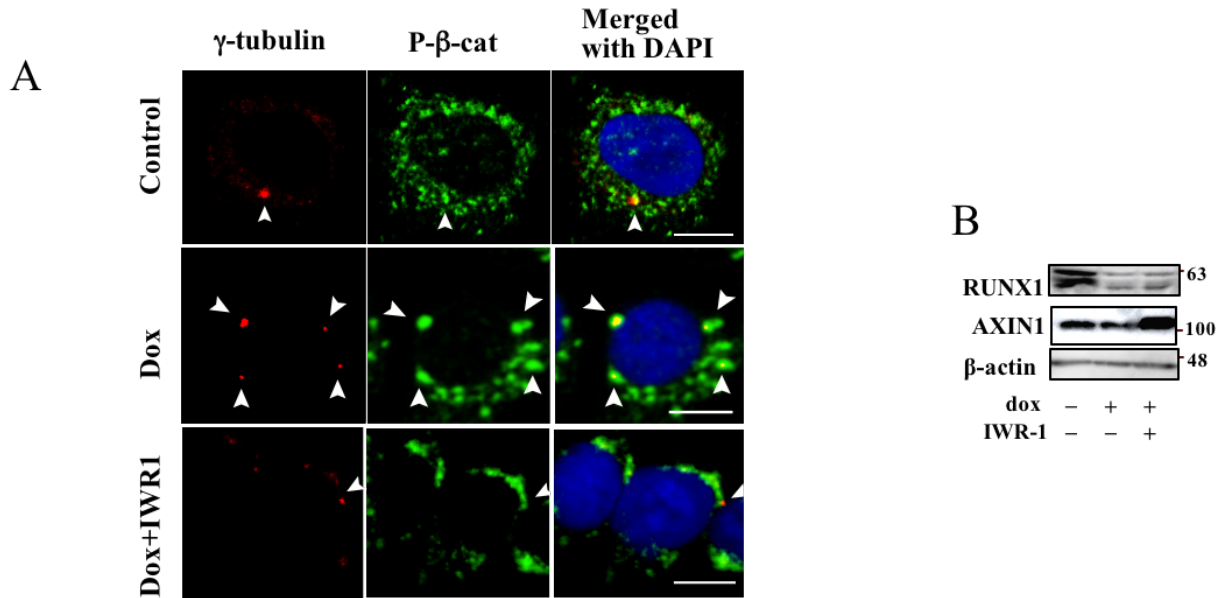

**Supplementary Fig. 9. Immunofluorescence imaging of P- $\beta$ -cat in MCF7 cells**

MCF7/shRX1<sub>RUNT</sub><sup>dox</sup> cells were treated with dox for 48 hours to silence *RUNX1* and the medium was supplemented with 5 $\mu$ M IWR1 for the last 36h. **A**, Centrosomal P- $\beta$ -cat was identified based on co-localization with  $\gamma$ -tubulin. Immunofluorescence microscopy was carried out essentially as described previously (Liang et al. 2008, PMID:18552835). Cells grown on coverslips were fixed in methanol at -20C $^{\circ}$  and permeabilized with 0.5% Triton X-100 in PBS for 5 min. Primary antibody for P- $\beta$ -cat (Cell Signaling Technology #9561) was used at a 1:200 dilution and anti- $\gamma$ -tubulin antibody (C7604, Sigma-Aldrich) was used at a 1:200 dilution. Confocal images were acquired using a Nikon Eclipse C1 laser-scanning microscope (Nikon, PA) fitted with a 60 $\times$ Nikon objective (PL APO, 1.4NA) and a Nikon image software. Scale bar = 10  $\mu$ m. **B**, Western blot analysis of the cell lysates from parallel cultures.

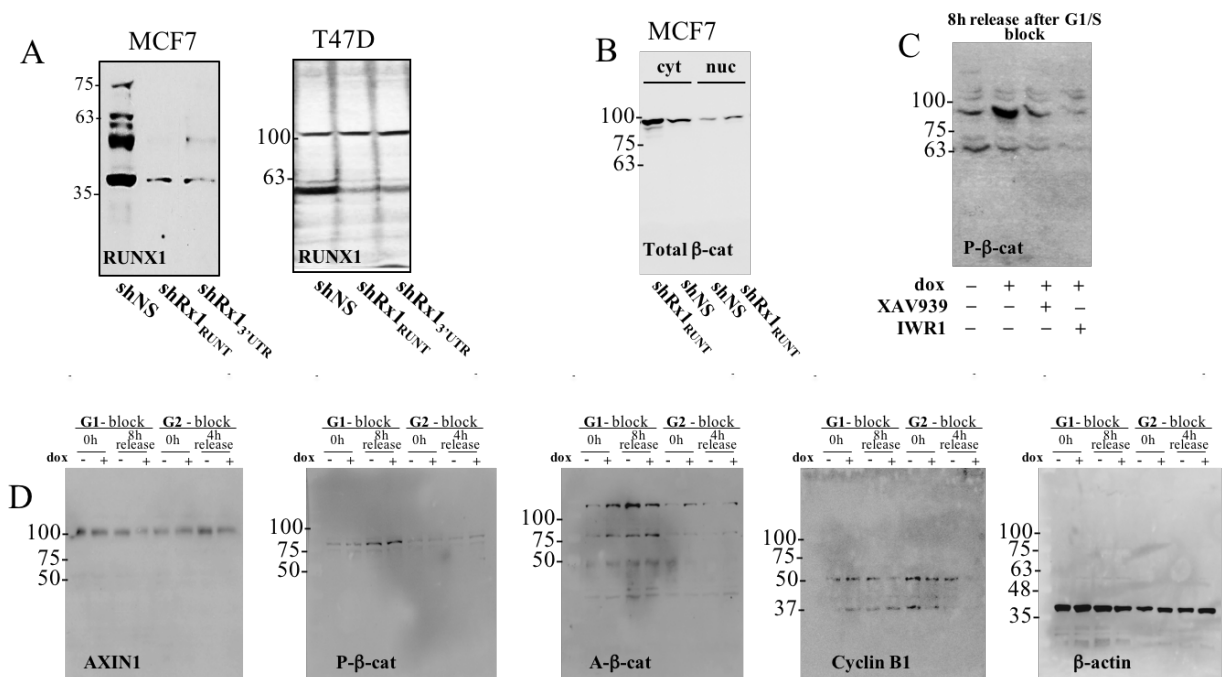

**Supplementary Fig. 10. Uncropped scans of key western blots.** (A) RUNX1 knockdown in MCF7 and T47D cells expressing a non-specific short hairpins RNA (shNS) or shRNAs targeting the RUNT domain of RUNX1 (shRx1RUNT) or its 3'UTR (shRx13'UTR). (B). Increased total b-catenin levels in nuclear and cytoplasmic protein extracts from RUNX1-depleted versus control MCF7 cells. (C) AXIN stabilizers reverse effect of RUNX1 depletion on P-β-cat in late S-phase. (D). Effect of RUNX1 knockdown on expression of the indicated proteins in the indicated phases of the cell cycle.

**Supplementary Table 1. Associations between RUNX1 and AXIN1 status, controlling for ER intensity (p-values based on the Pearson chi-square test, for the 2x2 table)**

| <b>ER low</b>                                                                                                                                                                           |              |          | <b>ER high</b>                                        |              |          |
|-----------------------------------------------------------------------------------------------------------------------------------------------------------------------------------------|--------------|----------|-------------------------------------------------------|--------------|----------|
| RUNX1 Status                                                                                                                                                                            | AXIN1 Status |          | RUNX1 Status                                          | AXIN1 Status |          |
|                                                                                                                                                                                         | Negative     | Positive |                                                       | Negative     | Positive |
| Negative                                                                                                                                                                                | 2            | 7        | Negative                                              | 2            | 1        |
| Positive                                                                                                                                                                                | 7            | 6        | Positive                                              | 0            | 6        |
| Odds Ratio = 0.24<br>95% CI: (0.036, 1.66)<br>p=0.15                                                                                                                                    |              |          | Odds Ratio = 21.7<br>95% CI: (0.64, 730.0)<br>p=0.033 |              |          |
| p-value for comparing the 2 odds ratio's (0.24 and 21.7) is p=0.006 – suggesting that the association between RUNX1 and AXIN1 is different, depending on the intensity of ER expression |              |          |                                                       |              |          |

**Supplementary Table 2 Sequences of oligonucleotides used in this study**

| <b>For dox-inducible pSLIK-RUNX1 vector</b>                       |                                                                     |                                     |
|-------------------------------------------------------------------|---------------------------------------------------------------------|-------------------------------------|
| F-Flag-mRx1                                                       | GACTACAAAGACGATGACGACAAGCGTATCCCCGTAGATGCCAG                        |                                     |
| R-mRx1_MfeI                                                       | CTCAGCCAATTGTCAGTAGGGCCGCCACACGGCCTCC                               |                                     |
| <b>For dox-inducible pSLIK shRUNX1 targeting the RUNT domain</b>  |                                                                     |                                     |
| T_h_Rx1_Runt                                                      | AGCGACCTCGAAGACATCGGCAGAAATAGTGAAGCCACAGATGTATTTCTGCCGATGTCTTCGAGG  |                                     |
| B_h_Rx1_Runt                                                      | ggcaCCTCGAAGACATCGGCAGAAATACATCTGTGGCTTCACTATTTCTGCCGATGCTTCGAGGT   |                                     |
| <b>For dox-inducible pSLIK shRUNX1 targeting the 3'UTR region</b> |                                                                     |                                     |
| T_h_Rx1_3UTR                                                      | AGCGCCGCTTGTTATCCAGAAGTATTAGTGAAGCCACAGATGTAATACTTCTGGA TAACCAAGCGA |                                     |
| B_h_Rx1_3UTR                                                      | ggcaTCGCTTGTTATCCAGAAGTATTACATCTGTGGCTTCACTAATACTTCTGGATA ACCAAGCGG |                                     |
| <b>Primer sequences for RT-qPCR</b>                               |                                                                     |                                     |
| Gene                                                              | Forward primer                                                      | Reverse primer                      |
| <i>GAPDH</i>                                                      | F: 5' -AGCCACATCGCTCAGACAC- 3'                                      | R: 5' -GCCCAATACGACCAAATCC- 3'      |
| <i>18S</i>                                                        | F: 5' -GTAACCCGTTGAACCCCAT-3'                                       | R: 5' -CCATCCAATCGGTAGTAGCG- 3'     |
| <i>AXIN1</i>                                                      | F: 5' -CAAGCAGAGGTATGTGCAGGA- 3'                                    | R: 5' -CACAAACGATGCTGTACACAG- 3'    |
| <i>AXIN2</i>                                                      | F: 5' -AAACGCAATGGGAAAGGCAC- 3'                                     | R: 5' -TGTGCTTTGGGCACTATGGG- 3'     |
| <i>CCND1</i>                                                      | F: 5' -CTCCTGTGCTGCGAAGTGG- 3'                                      | R: 5' -CTTCTGTTCCCTCGCAGACCTCC- 3'  |
| <i>LEF1</i>                                                       | F: 5' -ATCACACCCGTCACACATCC                                         | R: 5' -TGGGAAAACCTGGACATGGA         |
| <i>c-Myc</i>                                                      | F: 5' -AGAGAAGCTGGCCTCCTACC- 3'                                     | R: 5' -CGTCGAGGAGAGCAGAGAAT- 3'     |
| <i>SOX2</i>                                                       | F: 5' -TCAGGAGTTGTCAAGGCAGAG- 3'                                    | R: 5' -AGAGGCAAACCTGGAATCAGGA- 3'   |
| <i>NANOG</i>                                                      | F: 5' -ACCTCAGCTACAAACAGGTGA- 3'                                    | R: 5' -CTTCTGCGTCACACCATTGC- 3'     |
| <i>ALDH1A3</i>                                                    | F: 5' -TGGCACGAATCCAAGAGTGG- 3'                                     | R: 5' -TTGTCCACGTCGGGCTTATC- 3'     |
| <i>CD44</i>                                                       | F: 5' -TCCCTGGATCACCGACAGCACA- 3'                                   | R: 5' -CCTCTTGTTGCTGTCTCAGTTGCT- 3' |
| <i>Axin1 (mouse)</i>                                              | F: 5' -TGTCCAGTGATGCTGACACG-3'                                      | R: 5' -AAGTGCGAGGAATGTGAGGTA- 3'    |
| <b>Primer sequences for ChIP-qPCR</b>                             |                                                                     |                                     |
| Gene region                                                       | Forward primer                                                      | Reverse primer                      |
| <i>AXIN1</i>                                                      | F: 5' -CAGGTGATTTCTCGGTCCTC- 3'                                     | R: 5' -AGGCCTCCTAGGCACAG- 3'        |
| <i>Negative</i>                                                   | F: 5' -ATGTTGCCACTGGGGATCT- 3'                                      | R: 5' -TGCCAAAGCCTAGGGGAAGA- 3'     |
